# Supplementary material for: A cost-effective aptasensor capable of early diagnosis and monitoring of Alzheimer's disease with the rapid analysis of beta-amyloid peptide 1–40
Source: Royal Society of Chemistry journal article supplement (doi:10.1039/d2sd00162d), 2023-01-01
Supplement: d2sd00162d1.pdf [file d2sd00162d1.pdf]

Supplementary Information

**A Cost-Effective Aptasensor Capable of Early Diagnosing and  
Monitoring Alzheimer's Diseases with the Rapid Analysis of Beta-  
Amyloid Peptide 1-40**

Ashely Khang, Nnebuefe Idegwu, and Ji Hoon Lee\*

Luminescent MD, LLC, Hagerstown, MD, 21742, United States.

Corresponding Author

Ji Hoon Lee

[jhlee@luminescentmd.com](mailto:jhlee@luminescentmd.com)

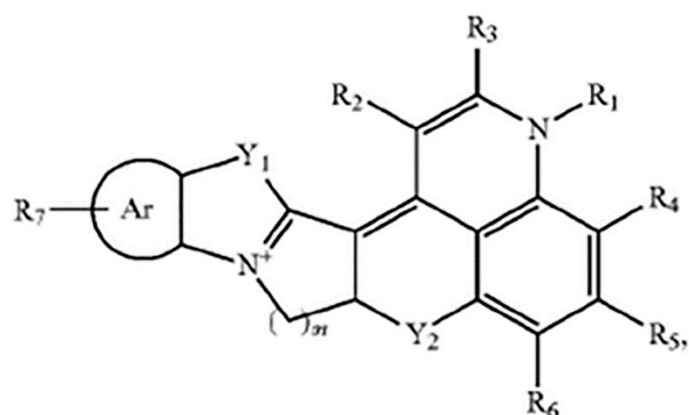

**Fig. S1** Merocyanine-based compounds. **Ar** is a substituted or unsubstituted aromatic ring; **Y1** and **Y2** are each independently selected from sulfur, oxygen, selenium, NR<sub>8</sub> and —CR<sub>8</sub>=CR<sub>9</sub>-; **R1** to **R9** are each independently selected from the group consisting of hydrogen, deuterium, substituted or unsubstituted C1-C10 alkyl, substituted or unsubstituted C2-C10 heteroalkyl containing at least one heteroatom, substituted or unsubstituted C2-C10 alkenyl, substituted or unsubstituted C2-C10 alkynyl, substituted or unsubstituted C1-C10 alkoxy, substituted or unsubstituted aryloxy, substituted or unsubstituted C1-C10 haloalkyl, halogen, cyano, hydroxyl, substituted or unsubstituted amino, substituted or unsubstituted amide, carbamate, sulthydryl, nitro, carboxyl, carboxylate, substituted or unsubstituted aryl, substituted or unsubstituted heteroaryl, substituted or unsubstituted aralkyl, quaternary ammonium, phosphoric acid, phosphate, phosphonate, —COR<sub>10</sub>, aldehyde, —COOR<sub>10</sub>, acyl chloride, sulfonic acid, sulfonate, polyalkylene oxide, and -L-Z functional groups. (US patent: “Merocyanine-based compounds, and dyes, kits and contrast medium compositions for labelling biomolecules comprising the same (Registration number: US9969887B2).

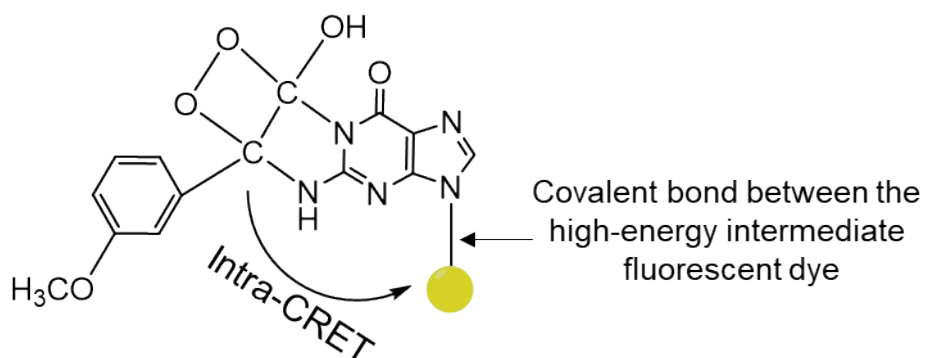

**Scheme S1.** Intra-CRET between the high-energy intermediate and fluorescent dye in guanine chemiluminescence reaction.

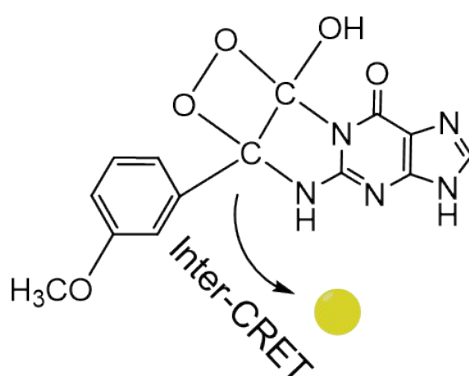

**Scheme S2.** Inter-CRET between high-energy intermediate and fluorescent dye in guanine chemiluminescence reaction. The distance between the high-energy intermediate and fluorescent dye should be shorter than 10 nm.

**Table S1** Comparison of the new biosensor and other methods for the quantification of beta-amyloid peptide 1-40.

| Method                                                                                                        | Time consuming procedure (e.g., centrifugation, washing, multiple incubations) | Analytical time (Hour) | Dynamic range                    | LOD                  | Reference     |
|---------------------------------------------------------------------------------------------------------------|--------------------------------------------------------------------------------|------------------------|----------------------------------|----------------------|---------------|
| Gold nanoparticle-based aptasensor for colorimetric detection                                                 | Yes                                                                            | ~ 2.15                 | 1 – 600 nM                       | 0.56 nM              | <sup>1</sup>  |
| Cu <sup>2+</sup> -Ab-AgNPs immunosensor                                                                       | Yes                                                                            | > 26                   | 0.25–150 nM                      | 0.086 nM             | <sup>2</sup>  |
| Capillary electrophoresis with fluorescence detection                                                         | Yes                                                                            | > 10                   | 7,000 – 3,5000 nM                | 500 nM               | <sup>3</sup>  |
| A label-free biosensor based on graphene and reduced graphene oxide dual-layer with electrochemical detection | Yes                                                                            | ~ 2.5                  | 0.011 – 55 nM                    | 0.002 nM             | <sup>4</sup>  |
| Impedimetric micro-immunosensing assay                                                                        | Yes                                                                            | ~ 1.5                  | 0.001 – 10 ng/ml                 | 0.005 nM             | <sup>5</sup>  |
| Label free biosensor with chemiluminescence detection operated based on the inter-CRET                        | No                                                                             | ~ 1                    | 5 – 500 ng/ml<br>(1.15 – 115 nM) | 2 ng/ml<br>(0.46 nM) | This research |

**Table S2.** Recovery test of the biosensor capable of quantifying beta-amyloid peptide 1-40 in CFS. (n = 5)

| Sample | Spiked beta-amyloid peptide 1-40 (ng/ml) | Detected beta-amyloid peptide 1-40 (ng/ml) | Recovery (%) |
|--------|------------------------------------------|--------------------------------------------|--------------|
| 1      | 15                                       | 13.9 ( $\pm$ 1.4)                          | 92.7         |
| 2      | 50                                       | 53.6 ( $\pm$ 3.4)                          | 107.2        |
| 3      | 150                                      | 162.5 ( $\pm$ 7.9)                         | 108.3        |

## References

1. X. Zhu, N. N. Zhang, Y. T. Zhang, B. X. Liu, Z. Chang, Y. L. Zhou, Y. Q. Hao, B. X. Ye and M. T. Xu, *Anal. Methods*, 2018, **10**, 641-645.
2. T. Hu, C. X. Chen, G. M. Huang and X. R. Yang, *Sens. Actuator B-Chem.*, 2016, **234**, 63-69.
3. R. Picou, J. P. Moses, A. D. Wellman, I. Kheterpal and S. D. Gilman, *Analyst*, 2010, **135**, 1631-1635.
4. J. Sethi, M. Van Bulck, A. Suhail, M. Safarzadeh, A. Perez-Castillo and G. H. Pan, *Microchim. Acta*, 2020, **187**, 10. Article number: 575.
5. N. Zakaria, M. Z. Ramli, K. Ramasamy, L. S. Meng, C. Y. Yean, K. K. B. Singh, Z. M. Zain and K. F. Low, *Anal. Biochem.*, 2018, **555**, 12-21.
